# Supplementary material for: Extracellular non-coding RNA signatures of the metacestode stage of Echinococcus multilocularis
Source: PLoS Negl Trop Dis. 2020 Nov 30;14(11):e0008890. doi: 10.1371/journal.pntd.0008890 (PMC7728270; doi:10.1371/journal.pntd.0008890)
Supplement: S3 Table — (XLSX) [file pntd.0008890.s010.xlsx]

## Sheet: Hoja1
S3 Table. Echinococcus multilocularis microRNAs detected in the EV-enriched (P100) and EV-depleted (S100) fractions of metacestode vesicular fluid (MVF) from active and transitional metacestode cultures
microRNA	Metacestode vesicular fluid (Active metacestodes)						Metacestode vesicular fluid (Non-stained)						Metacestode vesicular fluid (Stained)
	P100			S100			P100			S100			P100			S100
	Sequence	Mature read counts	Star read counts	Sequence	Mature read counts	Star read counts	Sequence	Mature read counts	Star read counts	Sequence	Mature read counts	Star read counts	Sequence	Mature read counts	Star read counts	Sequence	Mature read counts	Star read counts
miR-71-5p	ugaaagacgaugguagugaga	218987	N/D	ugaaagacgaugguagugaga	896212	1226	ugaaagacgaugguagugagau	169718	N/D	ugaaagacgaugguagugaga	181866	N/D	ugaaagacgaugguagugaga	44416	N/D	ugaaagacgaugguagugaga	18786	N/D
miR-9-5p	ucuuugguuaucuagcugugugU	124956	N/D	ucuuugguuaucuagcugugug	262622	N/D	ucuuugguuaucuagcugugugU	99096	N/D	ucuuugguuaucuagcugugug	147669	N/D	ucuuugguuaucuagcugugugU	33812	N/D	ucuuugguuaucuagcugugug	118073	N/D
miR-4989-3p	aaaaugcaccaacuaucugaga	125265	N/D	aaaaugcaccaacuaucugaga	39078	681	aaaaugcaccaacuaucugaga	114875	N/D	aaaaugcaccaacuaucugaga	10551	N/D	aaaaugcaccaacuaucugaga	47734	N/D	aaaaugcaccaacuaucugaga	25730	N/D
let-7-5p	ugagguaguguuucgaaugucu	58524	1058	ugagguaguguuucgaaugucu	226246	N/D	ugagguaguguuucgaaugucu	44885	N/D	ugagguaguguuucgaaugucu	170872	N/D	ugagguaguguuucgaaugucu	19396	N/D	ugagguaguguuucgaaugucu	53538	N/D
miR-10-5p	cacccuguagacccgaguuuga	27630	N/D	cacccuguagacccgaguuuga	21425	1925	cacccuguagacccgaguuug	20716	N/D	cacccuguagacccgaguu	9641	N/D	cacccuguagacccgaguuuga	4499	N/D	cacccuguagacccgaguuuga	7783	N/D
miR-1-3p	uggaauguugugaaguaugu	8895	N/D	uggaauguugugaaguaugu	26138	N/D	uggaauguugugaaguaugu	8509	N/D	uggaauguugugaaguaugu	13187	N/D	uggaauguugugaaguaugu	2290	N/D	uggaauguugugaaguaugu	5901	N/D
miR-281-3p	ugucauggaguugcucucua	48948	N/D	ugucauggaguugcucucua	51453	N/D	ugucauggaguugcucucua	18615	N/D	ugucauggaguugcucuc	71425	N/D	ugucauggaguugcucucua	3964	N/D	ugucauggaguugcucuc	15662	N/D
miR-277-3p	uaaaugcauuuucuggcccgua	12523	N/D	uaaaugcauuuucuggcccgua	3652	N/D	uaaaugcauuuucuggcccgua	8782	N/D	uaaaugcauuuucuggcccgua	4636	N/D	uaaaugcauuuucuggcccgua	4629	N/D	uaaaugcauuuucuggcccgua	3607	N/D
miR-184-3p	gggacggaagucugaaagguuu	2985	N/D	gggacggaagucugaaagguuu	8859	N/D	gggacggaagucugaaagguuu	3094	N/D	gggacggaagucugaaagguuu	4861	N/D	gggacggaagucugaaagguuu	1092	N/D	gggacggaagucugaaagguuu	2747	N/D
miR-125-5p	ucccugagacccuagaguuguc	17002	N/D	ucccugagacccuagaguuguc	4823	N/D	ucccugagacccuagaguuguc	9782	N/D	ucccugagacccuagaguuguc	1132	N/D	ucccugagacccuagaguuguc	3507	N/D	ucccugagacccuagaguuguc	1119	N/D
miR-190-5p	agauauguuuggguuacuuggug	9417	N/D	agauauguuuggguuacuuggug	11155	N/D	agauauguuuggguuacuuggug	7894	N/D	agauauguuuggguuacuuggug	1845	N/D	agauauguuuggguuacuuggugU	1924	N/D
miR-2c-3p	ucacagccaauauugaugaac	8656	N/D	ucacagccaauauugaugaac	5126	587	ucacagccaauauugaugaac	7355	N/D	ucacagccaauauugaugaac	5047	N/D	ucacagccaauauugaugaac	2064	N/D	ucacagccaauauugaugaac	6320	N/D
bantam-3p	ugagaucgcgauuacagcugau	21026	N/D	ugagaucgcgauuacagcugau	48982	N/D	ugagaucgcgauuacagcugau	15405	N/D	ugagaucgcgauuacagcugau	39890	N/D	ugagaucgcgauuacagcugau	3640	N/D	ugagaucgcgauuacagcugau	22640	N/D
miR-2162-3p	uauuaugcaacuuuucacucc	5527	N/D	uauuaugcaacuuuucacucc	1412	N/D	uauuaugcaacuuuucacucc	5219	N/D	uauuaugcaacuuuucacucc	1760	N/D	uauuaugcaacuuuucacucc	3237	N/D	uauuaugcaacuuuucacucc	6401	N/D
miR-87-3p	gugagcaaaguuucaggugugc	1217	N/D	gugagcaaaguuucaggugugc	29674	N/D	gugagcaaaguuucaggugugc	1062	N/D	gugagcaaaguuucaggugugc	9222	N/D				gugagcaaaguuucaggugugc	2361	N/D
miR-745-3p	ugcugccugguaagagcuguga	5729	N/D	ugcugccugguaagagcuguga	18016	N/D	ugcugccugguaagagcuguga	5602	N/D	ugcugccugguaagagcuguga	13123	N/D	ugcugccugguaagagcuguga	2452	N/D	ugcugccugguaagagcuguga	9976	N/D
miR-96-5p	auuggcacuuuuggaauuguca	856	N/D	auuggcacuuuuggaauuguc	2248	N/D				auuggcacuuuuggaauuguc	1050	N/D
miR-2a-3p	aaucacagcccugcuuggaacca	6528	N/D	aaucacagcccugcuuggaacc	1547	N/D	aaucacagcccugcuuggaacca	6189	N/D	aaucacagcccugcuuggaacc	1307	N/D	aaucacagcccugcuuggaacca	1795	N/D	aaucacagcccugcuuggaacc	2798	N/D
miR-3479a-3p	uauugcacguucuuucgccauc	1756	N/D	uauugcacguucuuucgccauc	737	N/D	uauugcacguucuuucgccauc	1583	N/D	uauugcacguucuuucgccauc	1709	N/D	uauugcacguucuuucgccauc	782	N/D	uauugcacguucuuucgccauc	768	N/D
miR-61-3p	ugacuagaaagagcacucacauc	10387	N/D	ugacuagaaagagcacucacauc	11424	N/D	ugacuagaaagagcacucacauc	10599	N/D	ugacuagaaagagcacucaca	16588	N/D	ugacuagaaagagcacucacauc	7868	N/D	ugacuagaaagagcacucaca	10362	N/D
miR-7a-5p	uggaagacuggugauauguugu	1118	N/D				uggaagacuggugauauguugu	1267	N/D
miR-2b-3p	uaucacagcccugcuugggacacU	1829	N/D				uaucacagcccugcuugggacacU	1697	N/D
Total read count number		719761			1670829			561944			707381			189101			314572
N/D: not detected
Upper case nucleotides indicate non-templated additions
