# Supplementary material for: Extracellular non-coding RNA signatures of the metacestode stage of Echinococcus multilocularis
Source: PLoS Negl Trop Dis. 2020 Nov 30;14(11):e0008890. doi: 10.1371/journal.pntd.0008890 (PMC7728270; doi:10.1371/journal.pntd.0008890)
Supplement: S5 Table — (XLSX) [file pntd.0008890.s012.xlsx]

## Sheet: Supp T5
S5 Table. Vertebrate (Mus musculus) microRNAs detected in the EV-depleted (S100) fraction of metacestode vesicular fluid (MVF) from active and transitional metacestode cultures
microRNA	MVF (Active metacestodes)			MVF (Non-stained)			MVF (Stained)
	S100			S100			S100
	Sequence	Mature read counts	Star read counts	Sequence	Mature read counts	Star read counts	Sequence	Mature read counts	Star read counts
mmu-miR-122-5p	uggagugugacaaugguguuu	3856	N/D	uggagugugacaaugguguuu	3370	N/D	uggagugugacaaugguguuu	3768	N/D
mmu-miR-21a-5p	uagcuuaucagacugaug	605	N/D	uagcuuaucagacugaug	970	N/D	uagcuuaucagacugaug	1499	N/D
mmu-miR-182-5p							uuuggcaaugguagaacu	623	N/D
U2/mmu-miR-1246	aauggauuuuuggaacuagg	1189	N/D	aauggauuuuuggaacuagg	1484	N/D	auggauuuuuggaacuagg	2247	N/D
Total read count number		5650			5824			8137
N/D: not detected
